# Supplementary material for: Green synthesis of hybrid papain/Ni3(PO4)2 rods electrocatalyst for enhanced oxygen evolution reaction
Source: Royal Society of Chemistry journal article supplement (doi:10.1039/d2nj03700a), 2022-01-01
Supplement: d2nj03700a1.pdf [file d2nj03700a1.pdf]

## Green Synthesis of Hybrid Papain/Ni<sub>3</sub>(PO<sub>4</sub>)<sub>2</sub> Rods Electrocatalyst for Enhanced Oxygen Evolution Reaction

Imtiaz Ahmed<sup>a</sup>, Rathindranath Biswas<sup>a</sup>, Harjinder Singh<sup>a</sup>, Ranjit A. Patil<sup>b</sup>, Rohit Varshney<sup>c</sup>,  
Debabrata Patra<sup>c</sup>, Yuan-Ron Ma<sup>b</sup> and Krishna Kanta Haldar<sup>a\*</sup>

<sup>a</sup>Department of Chemistry, Central University of Punjab, Bathinda, 151401, India.

<sup>b</sup>Department of Physics, National Dong Hwa University, Hualien 97401, Taiwan.

<sup>c</sup>Institute of Nano Science and Technology, Mohali, 160062, India.

\*Author to whom correspondence should be addressed; electronic Email:  
[krishankant.haldar@cup.edu.in](mailto:krishankant.haldar@cup.edu.in).

| Sr. No. | Entry                                                                                                                                                                    | Page No. |
|---------|--------------------------------------------------------------------------------------------------------------------------------------------------------------------------|----------|
| 1.      | Instrumentations and experimental procedure                                                                                                                              | S2       |
| 2.      | Preparation of working electrode and electrochemical experiments                                                                                                         | S2       |
| 3.      | <b>Figure S1.</b> Powder XRD pattern of Papain.                                                                                                                          | S3       |
| 4.      | <b>Figure S2.</b> FE-SEM images of Ni <sub>3</sub> (PO <sub>4</sub> ) <sub>2</sub> nanostructures synthesised in absence of Papain extract                               | S3       |
| 5.      | <b>Figure S3.</b> TEM image of Papain/Ni <sub>3</sub> (PO <sub>4</sub> ) <sub>2</sub> @700 °C microrods using 1 mL of Papain extract.                                    | S4       |
| 6.      | <b>Figure S4.</b> Chronoamperometry method of Papain/Ni <sub>3</sub> (PO <sub>4</sub> ) <sub>2</sub> composite at an overpotential of 217 mV for 24 hours.               | S4       |
| 7.      | <b>Figure S5.</b> Cyclic voltammetry, ECSA, C <sub>dl</sub> Papain/Ni <sub>3</sub> (PO <sub>4</sub> ) <sub>2</sub> and Ni <sub>3</sub> (PO <sub>4</sub> ) <sub>2</sub>   | S5       |
| 8.      | <b>Figure S6.</b> Cyclic voltammetry, ECSA, C <sub>dl</sub> of as synthesised Papain/Ni <sub>3</sub> (PO <sub>4</sub> ) <sub>2</sub> using 0.5, 1, and 2 ml of extract   | S6       |
| 9.      | <b>Figure S7.</b> N <sub>2</sub> adsorption-desorption isotherm of composite nanostructures catalyst                                                                     | S7       |
| 10.     | <b>Figure S8.</b> Post catalytic powder XRD pattern of Papain/Ni <sub>3</sub> (PO <sub>4</sub> ) <sub>2</sub>                                                            | S7       |
| 11.     | <b>Figure S9.</b> High magnification FE-SEM images of Papain/Ni <sub>3</sub> (PO <sub>4</sub> ) <sub>2</sub> composite microstructures after chronoamperometry stability | S8       |
| 12.     | <b>Figure S10.</b> After catalysis high-resolution deconvoluted XPS spectra                                                                                              | S8       |
| 13.     | <b>Figure S11.</b> Post catalytic FT-IR of Papain/Ni <sub>3</sub> (PO <sub>4</sub> ) <sub>2</sub> microstructures.                                                       | S9       |
| 16.     | <b>Figure S12.</b> Polarization curves of composite of 1 <sup>st</sup> and 3000 <sup>th</sup> cycles of continuous operation in neutral condition.                       | S9       |
| 17.     | <b>Table S1.</b> Comparison of OER activity                                                                                                                              | S10      |
| 18.     | TOF Calculation                                                                                                                                                          | S10-11   |
| 19.     | References                                                                                                                                                               | S11      |

**Instrumentations:**

ATR-FTIR were performed using Bruker (Model: Vertex 70v) ATR spectrometer. Raman spectra were acquired with a confocal Raman microscope (Witec alpha 300 R) using a 532 nm laser equipped with an upright optical microscope (Zeiss). Powder X-ray diffraction (PXRD) pattern was obtained on a Bruker D8 Advances instrument using Cu-K $\alpha$  ( $\lambda = 1.5406 \text{ \AA}$ ) radiation in the  $2\theta$  range from  $10^\circ$  to  $80^\circ$  with an acceleration voltage of 40KV (Detector used = Xcelerator FASS ID detector and voltage = 45 kV). FESEM instrument was used to perceive scanning electron microscopy (SEM) images (Carl Zeiss, Voltage = 20 kV). X-ray photoelectron spectroscopy (XPS) measurements were performed using the Thermo Scientific Inc. System equipped with a microfocus monochromatic Al K $\alpha$  X-ray source of energy  $\sim 1450$  e. All electrochemical measurements were performed with Metrohm Autolab (M204 multichannel potentiostat galvanostat using Nova 2.1.4 software. Brunauer-Emmett-Teller (BET) measurement was carried out with Make-Quanta Chrome instruments, Model: AutosorbiQ and ASiQwin. High Resolution Transmission Electron Microscope (HR-TEM) images was taken by Technai G2s Twin, Model FEI, and Raman spectra were acquired with a confocal Raman microscope (Witec alpha 300 R) using a 532 nm laser equipped with an upright optical microscope (Zeiss).

**Preparation of electrodes:**

The excellent properties of Papain/Ni<sub>3</sub>(PO<sub>4</sub>)<sub>2</sub> catalyst for OER in alkaline, neutral and acidic electrolyte make it promising catalyst for electrocatalytic water splitting. Catalyst ink was prepared by wisely crushing the mixture of Papain/Ni<sub>3</sub>(PO<sub>4</sub>)<sub>2</sub> using a mortar and pestle in which 4 mg of the finely ground product was taken in a 0.5 mL solution containing a mixture of ethanol (200  $\mu$ L) and deionized water (300  $\mu$ L) and sonicated for 30 minutes. Then, 25  $\mu$ L of the binder was carefully added and sonicate again for 10 minutes thereafter 5  $\mu$ L drop-coated over a GC (glassy carbon) electrode, and it was dried under mild vacuum condition for overnight.

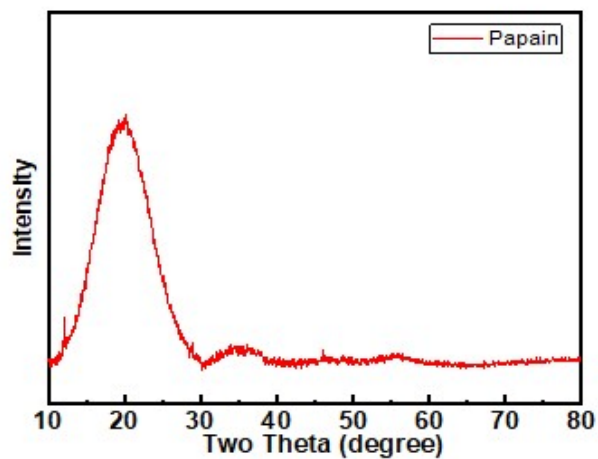

Figure S1. Powder XRD pattern of Papain.

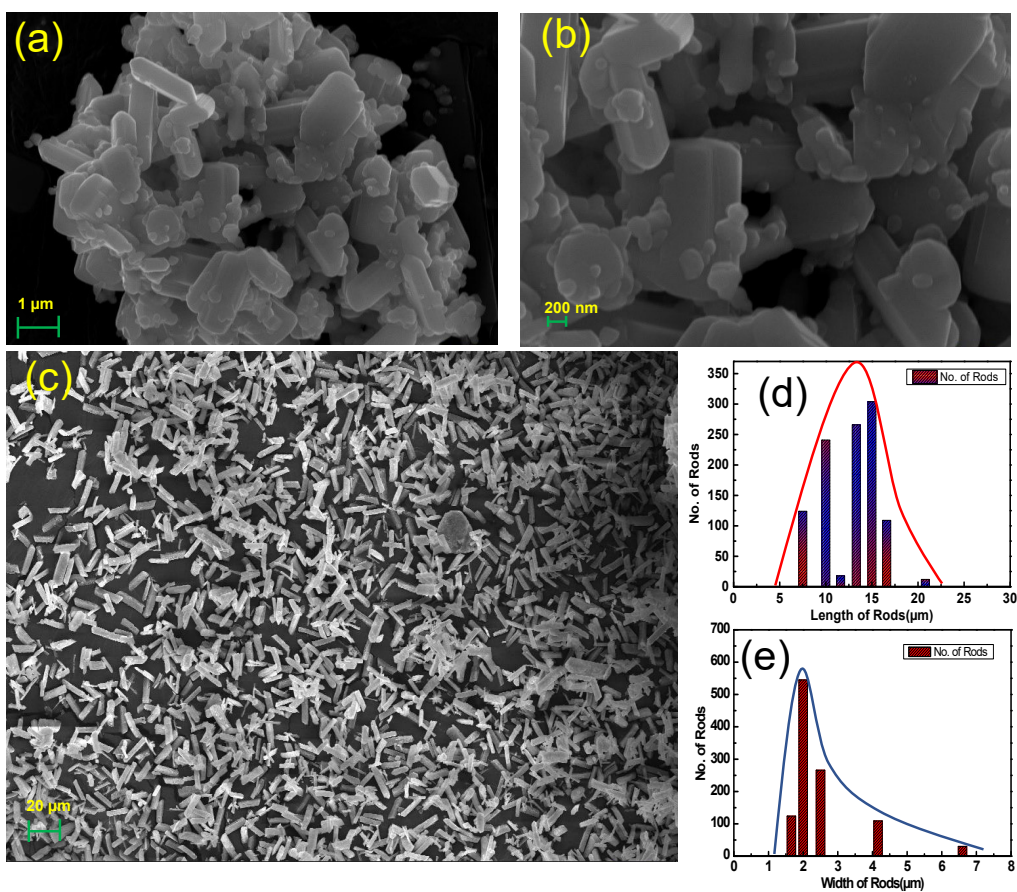

Figure S2. (a) and (b) different magnification FE-SEM images of  $\text{Ni}_3(\text{PO}_4)_2$  nanostructures synthesised in absence of Papain extract. (c) FE-SEM image and (d, e) are particle size (length and width) distribution histogram of Papain/ $\text{Ni}_3(\text{PO}_4)_2$ .

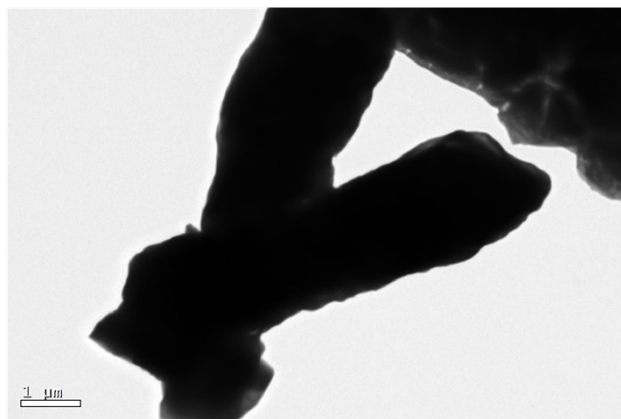

**Figure S3.** TEM image of Papain/ $\text{Ni}_3(\text{PO}_4)_2@700\text{ }^\circ\text{C}$  microrods using 1 mL of Papain extract.

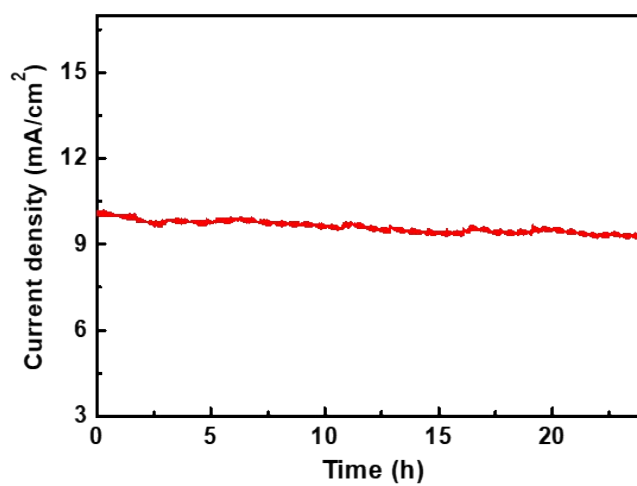

**Figure S4.** Chronoamperometry method of Papain/ $\text{Ni}_3(\text{PO}_4)_2$  composite at an overpotential of 217 mV for 24 hours.

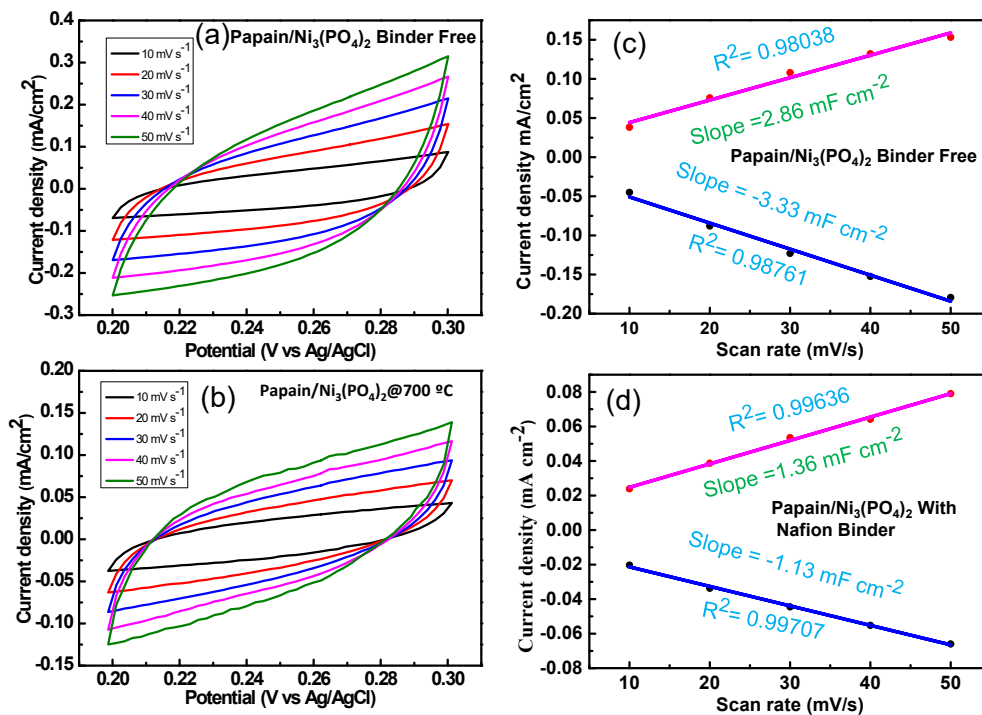

**Figure S5.** Cyclic voltammetry curves of (a) Papain/Ni<sub>3</sub>(PO<sub>4</sub>)<sub>2</sub> and (b) and Ni<sub>3</sub>(PO<sub>4</sub>)<sub>2</sub> (c-d) are their corresponding plot of J<sub>a</sub> and J<sub>c</sub> against scan rate for the determination of double layer capacitance (C<sub>dl</sub>) of the catalysts, respectively.

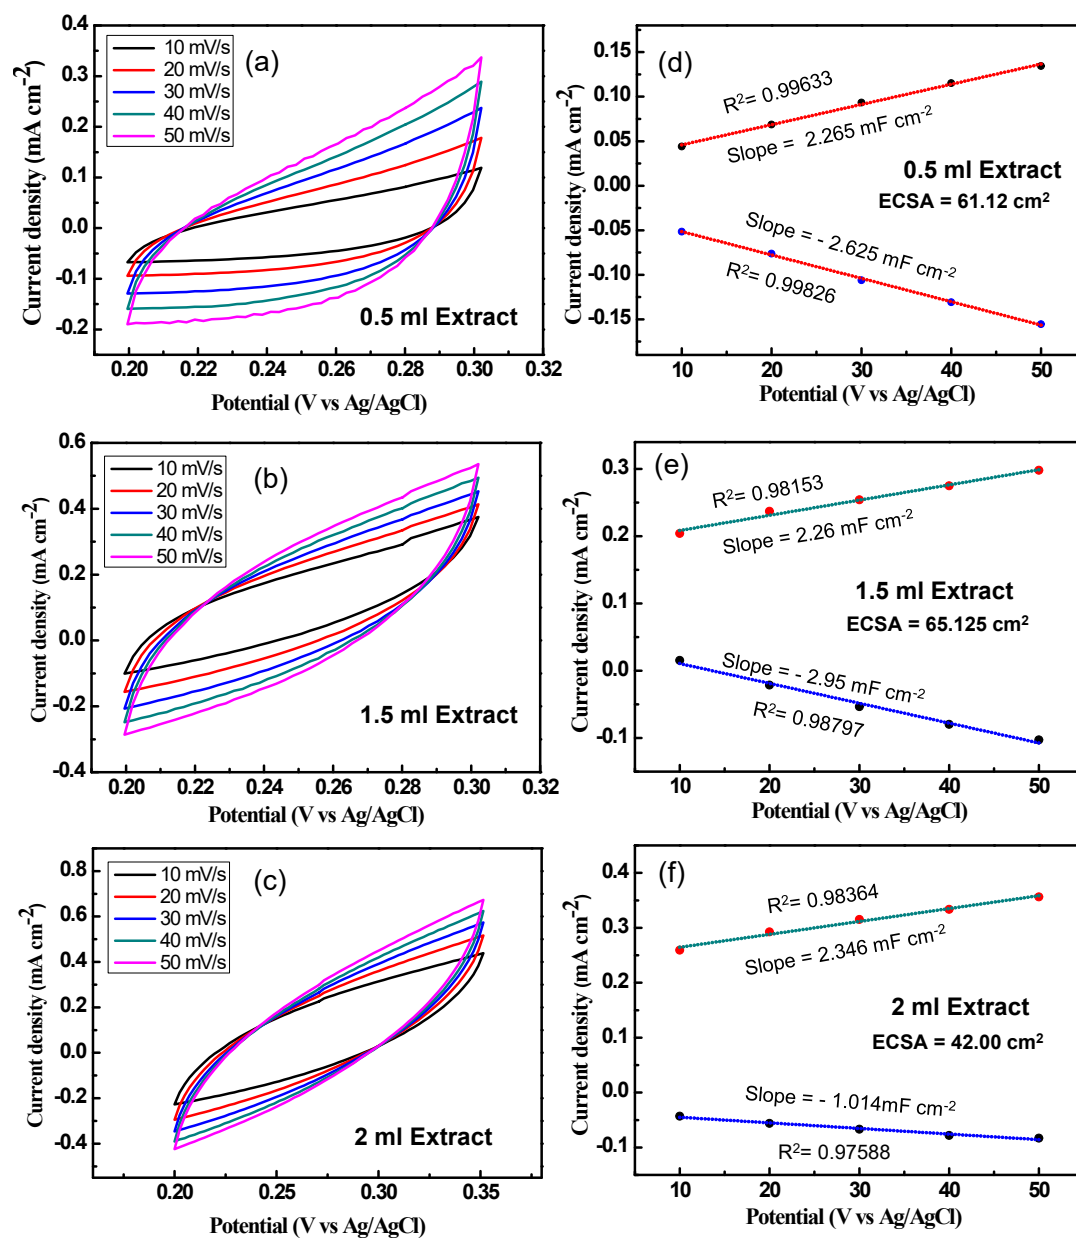

**Figure S6.** (a-c) Cyclic voltammetry curves and (d-f) are their corresponding plot of  $J_a$  and  $J_c$  against scan rate for the determination of double layer capacitance ( $C_{dl}$ ) of as synthesised  $\text{Papain}/\text{Ni}_3(\text{PO}_4)_2$  using 0.5, 1, and 2 ml of Papain extract, respectively.

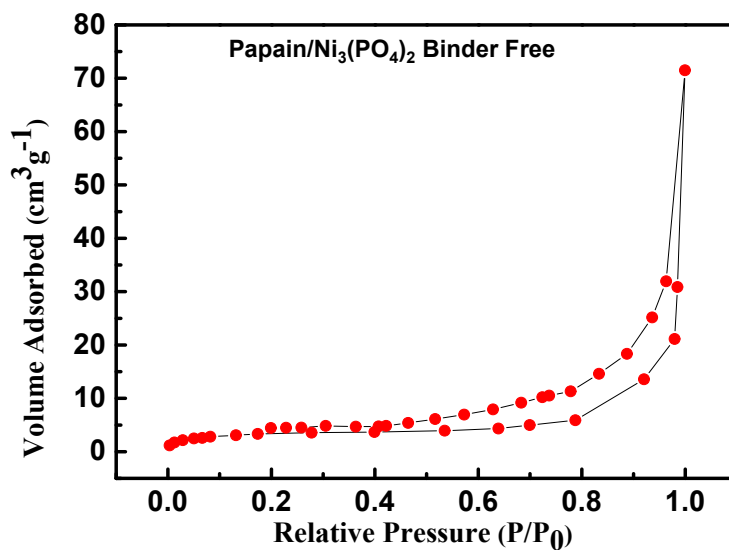

**Figure S7:** The  $N_2$  adsorption-desorption isotherm of Papain/ $Ni_3(PO_4)_2$  composite microstructures catalyst.

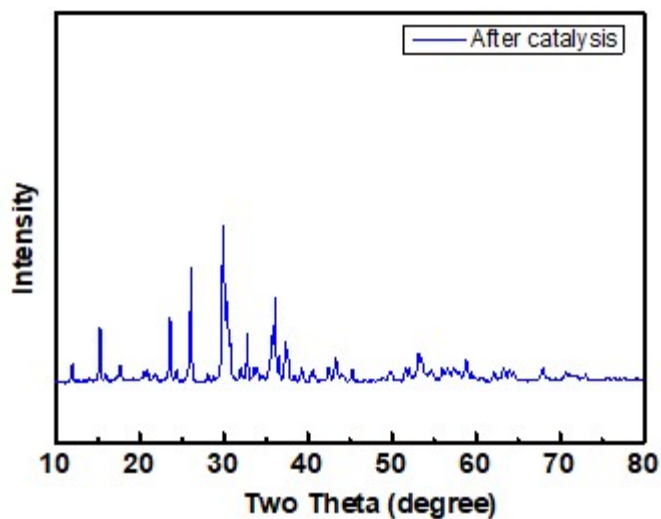

**Figure S8.** (a) Post catalytic powder XRD pattern of Papain/ $Ni_3(PO_4)_2$  microstructures.

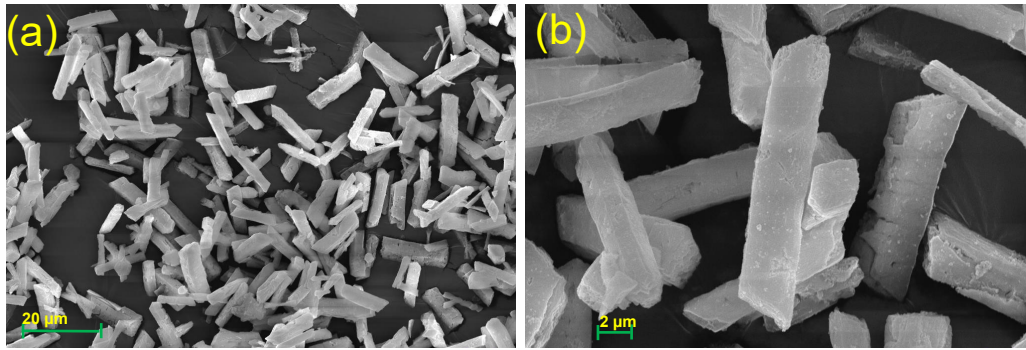

**Figure S9.** (a), and (b) High magnification FE-SEM images of Papain/ $\text{Ni}_3(\text{PO}_4)_2$  composite microstructures after chronoamperometry stability test for OER activity.

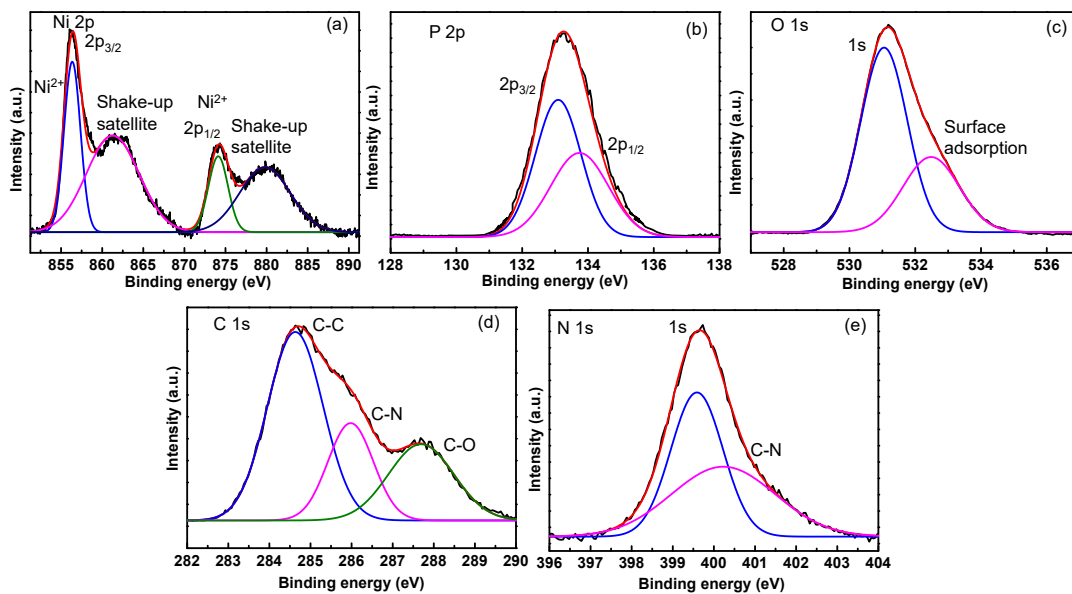

**Figure S10.** After catalysis high-resolution deconvoluted XPS spectra of (a) Ni 2p, (b) P 2p, (c) O 1s (d) C 1s, and (e) N 1s core-levels in Papain/ $\text{Ni}_3(\text{PO}_4)_2$  composite structure.



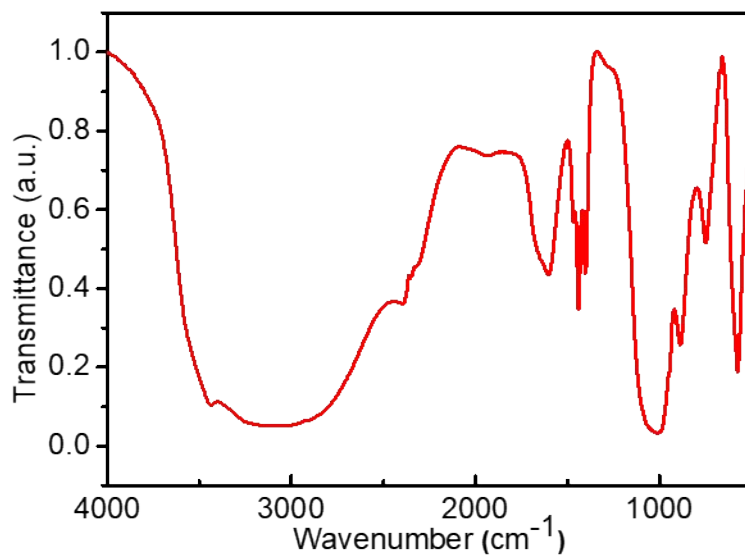

**Figure S11.** Post catalytic FT-IR of Papain/Ni<sub>3</sub>(PO<sub>4</sub>)<sub>2</sub> microstructures.

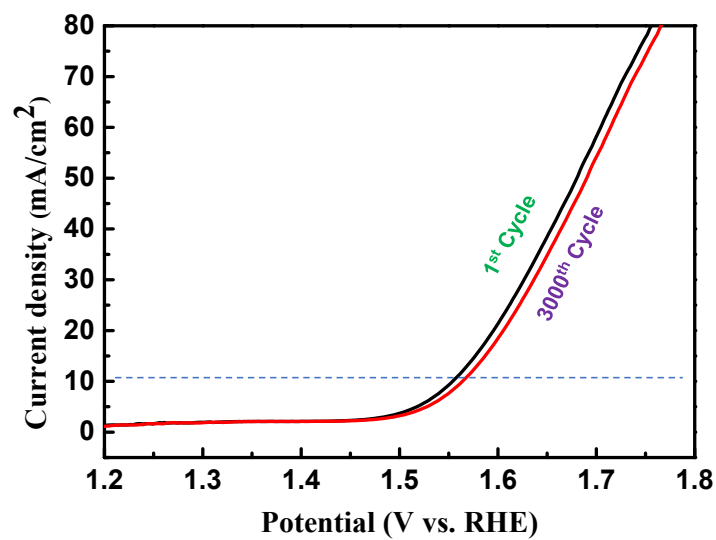

**Figure S12.** Polarization curves of composite of 1<sup>st</sup> and 3000<sup>th</sup> cycles of continuous operation in neutral condition.

**Table S1.** Comparison of OER activity of Papain/Ni<sub>3</sub>(PO<sub>4</sub>)<sub>2</sub> hybrid nanostructure with some reported Nickel- based catalysts in an alkaline medium.

| Catalyst                                                                             | Overpotential (mV) at 10 mA/cm <sup>2</sup> | Tafel slope (mV dec <sup>-1</sup> ) | Electrolyte used | Reference        |
|--------------------------------------------------------------------------------------|---------------------------------------------|-------------------------------------|------------------|------------------|
| NiO/Ni-foam                                                                          | 300 mV                                      | 98 mV/dec                           | 1 M KOH          | 1                |
| CoMoNiSNF-31                                                                         | 166 mV                                      | 58 mV/dec                           | 1 M KOH          | 2                |
| NiCo <sub>2</sub> O <sub>4</sub> /NiCoP                                              | 295 mV                                      | 70 mV/dec                           | 1 M KOH          | 3                |
| NiCoP                                                                                | 338 mV                                      | 78 mV/dec                           | 1 M KOH          | 3                |
| NiCo <sub>2</sub> O <sub>4</sub>                                                     | 384 mV                                      | 80 mV/dec                           | 1 M KOH          | 3                |
| Co <sub>9</sub> S <sub>8</sub> /Ni <sub>3</sub> S <sub>2</sub> /NF                   | 192 mV                                      | 70 mV/dec                           | 1 M KOH          | 2                |
| MoS <sub>2</sub> /Ni <sub>3</sub> S <sub>2</sub> /NF                                 | 239 mV                                      | 71 mV/dec                           | 1 M KOH          | 2                |
| Ni <sub>3</sub> S <sub>2</sub> /NF                                                   | 395 mV                                      | 74 mV/dec                           | 1 M KOH          | 2                |
| Ni <sub>12</sub> P <sub>5</sub> /Ni <sub>3</sub> (PO <sub>4</sub> ) <sub>2</sub> -SS | 378 mV                                      | 78.6 mV/dec                         | 1 M KOH          | 4                |
| Ni <sub>12</sub> P <sub>5</sub> /Ni <sub>3</sub> (PO <sub>4</sub> ) <sub>2</sub> -HS | 318 mV                                      | 69.8 mV/dec                         | 1 M KOH          | 4                |
| NiO/CN                                                                               | 281 mV                                      | 66.37 mV/dec                        | 1 M KOH          | 5                |
| NiO@MoO <sub>3</sub> /VC                                                             | 280 mV                                      | 64.5 mV/dec                         | 1 M KOH          | 6                |
| NiCoP/CC                                                                             | 242 mV                                      | 64.2 mV/dec                         | 1 M KOH          | 7                |
| Ni-NiO/N-rGO                                                                         | 240 mV                                      | 43 mV/dec                           | 0.1 M KOH        | 8                |
| NCNT/CoO-NiO-NiCo                                                                    | 270 mV                                      | 40 mV/dec                           | 1 M KOH          | 9                |
| NiS/NF                                                                               | 320 mV                                      | 71 mV/dec                           | 1 M KOH          | 10               |
| Papain/Ni <sub>3</sub> (PO <sub>4</sub> ) <sub>2</sub>                               | 217 mV                                      | 63 mV/dec                           |                  | <b>This work</b> |

### Determination of Turn Over Frequency (TOF)

The TOF value for OER performance can be calculated as described equation (4)<sup>52-54</sup>

$$TOF = \frac{j N_A}{F n \Gamma} \quad \text{----- (4)}$$

Where,

$j$  = current density (mA cm<sup>-2</sup>),  $N_A$  = Avogadro constant ( $6.0221 \times 10^{23} \text{ mole}^{-1}$ ),  $n$  is the number of electrons transferred = 4, and  $\Gamma$  is the surface or total concentration of catalyst in terms of number of atoms.

Surface area of GC = 0.07065 cm<sup>2</sup>

Mass loading catalyst on GC = 0.193 mg/cm<sup>2</sup> = (0.193 mg/cm<sup>2</sup> × 0.07065 cm<sup>2</sup>) = 0.01364 mg = 1.36 × 10<sup>-5</sup> g

Surface concentration of Ni ( $\Gamma$ ): ( $6.7128 \times 10^{16}$  atoms/surface area of GC) =  $9.5015 \times 10^{17}$  atoms cm<sup>-2</sup>.

**TOF value for OER experiment at overpotential of 310 mV (1.54 V vs. RHE):**

$$TOF_{1.54V} = \frac{j N_A}{F n \Gamma} = \frac{39.03 \times 10^{-3} \text{ A cm}^{-2} \times (6.0221 \times 10^{23} \text{ atoms mole}^{-1})}{96485 \text{ s A mole}^{-1} \times 4 \times (9.5015 \times 10^{17} \text{ atoms cm}^{-2})}$$

$$TOF_{1.54V} = 0.06409 \text{ s}^{-1}$$

Number of Ir atoms present on GC surface =  $6.0655 \times 10^{-8} \text{ mole} = 6.0655 \times 10^{-8} \times 6.0221 \times 10^{23} = 3.6527 \times 10^{16}$

**Surface concentration ( $\Gamma$ ):**  $(3.6527 \times 10^{16} / \text{surface area of GC}) = 5.1701 \times 10^{17} \text{ atoms cm}^{-2}$ .

**TOF IrO<sub>2</sub> for OER at an overpotential of 310 mV:**

$$TOF_{1.54V} = \frac{j N_A}{F n \Gamma} = \frac{3.8 \times 10^{-3} \text{ A cm}^{-2} \times (6.0221 \times 10^{23} \text{ atoms mole}^{-1})}{96485 \text{ s A mole}^{-1} \times 4 \times (5.1701 \times 10^{17} \text{ atoms cm}^{-2})}$$

$$= 0.01146 \text{ s}^{-1}$$

## References

1. Khalid, S.; Cao, C.; Ahmad, A.; Wang, L.; Tanveer, M.; Aslam, I.; Tahir, M.; Idrees, F.; Zhu, Y., Microwave assisted synthesis of mesoporous NiCo<sub>2</sub>O<sub>4</sub> nanosheets as electrode material for advanced flexible supercapacitors. *Rsc Advances* **2015**, *5* (42), 33146-33154.
2. Yang, Y.; Yao, H.; Yu, Z.; Islam, S. M.; He, H.; Yuan, M.; Yue, Y.; Xu, K.; Hao, W.; Sun, G., Hierarchical nanoassembly of MoS<sub>2</sub>/Co<sub>9</sub>S<sub>8</sub>/Ni<sub>3</sub>S<sub>2</sub>/Ni as a highly efficient electrocatalyst for overall water splitting in a wide pH range. *Journal of the American Chemical Society* **2019**, *141* (26), 10417-10430.
3. Jin, W.; Chen, J.; Wu, H.; Zang, N.; Li, Q.; Cai, W.; Wu, Z., Interface engineering of oxygen-vacancy-rich NiCo<sub>2</sub>O<sub>4</sub>/NiCoP heterostructure as an efficient bifunctional electrocatalyst for overall water splitting. *Catalysis Science & Technology* **2020**, *10* (16), 5559-5565.
4. Chang, J.; Lv, Q.; Li, G.; Ge, J.; Liu, C.; Xing, W., Core-shell structured Ni<sub>12</sub>P<sub>5</sub>/Ni<sub>3</sub>(PO<sub>4</sub>)<sub>2</sub> hollow spheres as difunctional and efficient electrocatalysts for overall water electrolysis. *Applied Catalysis B: Environmental* **2017**, *204*, 486-496.
5. Liao, C.; Yang, B.; Zhang, N.; Liu, M.; Chen, G.; Jiang, X.; Chen, G.; Yang, J.; Liu, X.; Chan, T. S., Constructing conductive interfaces between nickel oxide nanocrystals and polymer carbon nitride for efficient electrocatalytic oxygen evolution reaction. *Advanced Functional Materials* **2019**, *29* (40), 1904020.
6. Illathvalappil, R.; George, L.; Kurungot, S., Coexisting few-layer assemblies of NiO and MoO<sub>3</sub> deposited on vulcan carbon as an efficient and durable electrocatalyst for water oxidation. *ACS Applied Energy Materials* **2019**, *2* (7), 4987-4998.
7. Du, C.; Yang, L.; Yang, F.; Cheng, G.; Luo, W., Nest-like NiCoP for highly efficient overall water splitting. *Acs Catalysis* **2017**, *7* (6), 4131-4137.
8. Liu, X.; Liu, W.; Ko, M.; Park, M.; Kim, M. G.; Oh, P.; Chae, S.; Park, S.; Casimir, A.; Wu, G., Metal (Ni, Co)-metal oxides/graphene nanocomposites as multifunctional electrocatalysts. *Advanced Functional Materials* **2015**, *25* (36), 5799-5808.
9. Liu, X.; Park, M.; Kim, M. G.; Gupta, S.; Wu, G.; Cho, J., Integrating NiCo alloys with their oxides as efficient bifunctional cathode catalysts for rechargeable zinc-air batteries. *Angewandte Chemie International Edition* **2015**, *54* (33), 9654-9658.
10. Ren, J.-T.; Yuan, Z.-Y., Hierarchical nickel sulfide nanosheets directly grown on Ni foam: a stable and efficient electrocatalyst for water reduction and oxidation in alkaline medium. *ACS Sustainable Chemistry & Engineering* **2017**, *5* (8), 7203-7210.
